# Supplementary material for: Zika virus infection in Nicaraguan households
Source: PubMed Central journal article supplement (PMC6014677; doi:10.1371/journal.pntd.0006518), 2018-05-31

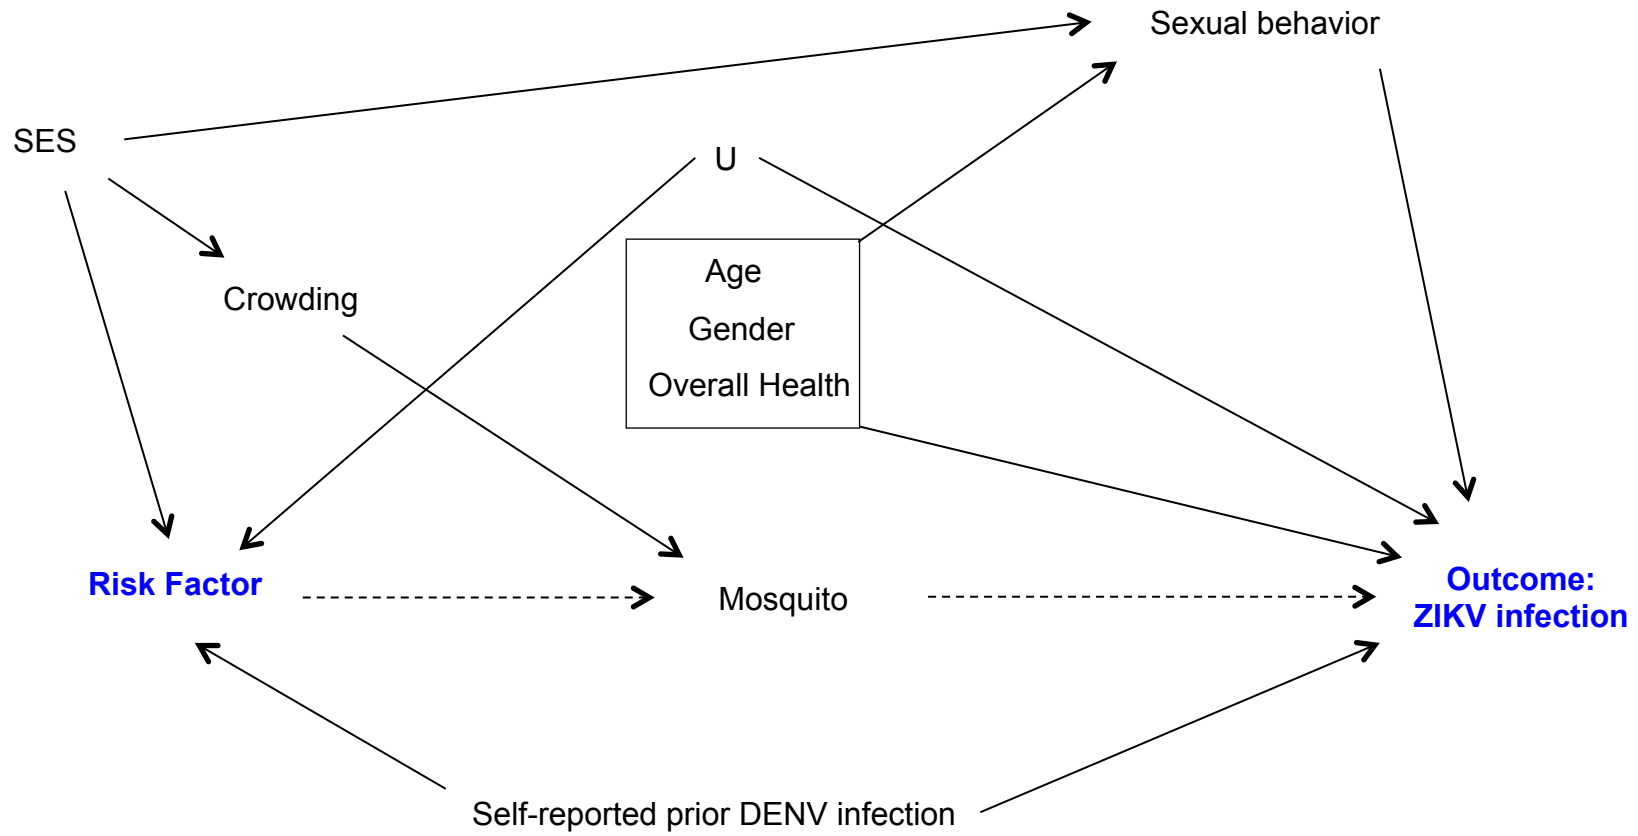

Supplement: pntd.0006518.s001.pdf [file pntd.0006518.s001.pdf]
