# Supplementary material for: Zika virus infection in Nicaraguan households
Source: PubMed Central journal article supplement (PMC6014677; doi:10.1371/journal.pntd.0006518), 2018-05-31
Supplement: pntd.0006518.s002.pdf [file pntd.0006518.s002.pdf]

**Supplementary Table 1.** Zika virus (ZIKV) positive index cases and contacts by rRT-PCR tested bodily fluids over study visits.

| ID     | Fluid | Visit Number    |            |              |              |               |             |
|--------|-------|-----------------|------------|--------------|--------------|---------------|-------------|
|        |       | 0<br>Enrollment | 1<br>Day 1 | 2<br>Day 3/4 | 3<br>Day 6/7 | 4<br>Day 9/10 | 5<br>Day 21 |
| 150    | Serum | 2               |            |              |              |               | 24          |
|        |       | 5.9             |            |              |              |               | N           |
|        |       | 2               | 3          | 5            | 8            | 11            | 24          |
| Urine  | N     | 3.7             | 5.7        | 8.9          | N            | N             |             |
|        | 2     | 3               | 5          | 8            | 11           | 24            |             |
|        | 5.7   | 5               | 6.6        | N            | N            | N             |             |
| Saliva | 3     |                 | 6          |              |              |               |             |
|        | 5.3   |                 | N          |              |              |               |             |
|        | 3     | 6               | 9          | 12           | 14           | 27            |             |
| Urine  | N     | N               | N          | N            | N            | N             |             |
|        | 3     | 6               | 9          | 12           | 14           | 27            |             |
|        | 5     | 5.5             | N          | N            | N            | N             |             |
| Saliva | 2     |                 | 3          |              |              | 25            |             |
|        | N     |                 | 3.8        |              |              | N             |             |
|        | 2     | 4               | 6          | 10           | 13           | 25            |             |
| Urine  | 5.2   | 5.3             | 5.9        | 4.4          | N            | N             |             |
|        | 2     | 4               | 6          | 10           | 13           | 25            |             |
|        | 5.9   | N               | N          | N            | N            | N             |             |
| Saliva | 1     |                 | 4          |              |              | 24            |             |
|        | N     |                 | N          |              |              | N             |             |
|        | 1     | 4               | 6          | 9            | 11           | 24            |             |
| Urine  | 4.5   | N               | N          | N            | N            | N             |             |
|        | 1     | 4               | 6          | 9            | 11           | 24            |             |
|        | 4.1   | N               | N          | N            | N            | N             |             |
| Saliva | 2     |                 | 5          |              |              | 27            |             |
|        | N     |                 | N          |              |              | N             |             |
|        | 2     | 6               | 9          | 13           |              | 27            |             |
| Urine  | 5.2   | 6.6             | 3.3        | N            |              | N             |             |
|        | 2     | 6               | 9          | 13           | 15           | 27            |             |
|        | 6.1   | N               | N          | N            | N            | N             |             |
| Saliva | 2     |                 | 5          |              |              | 26            |             |
|        | N     |                 | N          |              |              | N             |             |
|        | 2     | 5               | 8          | 10           | 13           | 26            |             |
| Urine  | 3.3   | N               | N          | N            | N            | N             |             |
|        | 2     | 5               | 8          |              | 13           | 26            |             |
|        | 4.9   | N               | N          |              | N            | N             |             |
| Saliva | 3     |                 | 4          |              |              | 26            |             |
|        | N     |                 | N          |              |              | N             |             |
|        | 3     | 5               | 7          | 11           | 14           | 26            |             |
| Urine  | 3.4   | 4.7             | N          | N            | 4.2          | N             |             |
|        | 3     | 5               | 7          | 11           | 14           | 26            |             |
|        | 6.2   | 4.7             | N          | N            | N            | N             |             |
| Saliva | 2     |                 | 6          |              |              | 27            |             |
|        | 5.3   |                 | N          |              |              | N             |             |
|        |       | 6               | 9          | 11           | 15           | 27            |             |
| Urine  |       | N               | N          | N            | N            | N             |             |
|        | 3     | 6               | 9          | 11           | 15           | 27            |             |
|        | 4.7   | N               | N          | N            | N            | N             |             |
| Saliva | 2     |                 | 4          |              |              | 24            |             |
|        | 7.2   |                 | 4.3        |              |              | N             |             |
|        | 2     | 3               | 5          | 9            | 12           | 24            |             |
| Urine  | N     | 4.9             | 4.5        | N            | 4.2          | N             |             |
|        | 2     | 3               | 5          | 9            | 12           | 24            |             |
|        | 4.3   | 5.7             | N          | N            | N            | N             |             |
| Saliva | 3     |                 | 7          |              |              | 30            |             |
|        | 5.8   |                 | N          |              |              | N             |             |
|        | 5     | 9               | 12         | 15           | 17           | 30            |             |
| Urine  | 2.4   | 4.8             | N          | N            | N            | N             |             |
|        | 5     | 9               | 12         | 15           | 17           | 30            |             |
|        | 5.7   | N               | N          | N            | N            | N             |             |
| Saliva | 1     |                 | 4          |              |              | 25            |             |

Days post-symptom onset

Vira loads (10log copies/ml)

N = Negative

Index case from cohort

Index case from surveillance

ZIKV pos. Contacts

Asympt. ZIKV pos. contact

P= Pregnant women

|            |     |     |     |     |     |    |
|------------|-----|-----|-----|-----|-----|----|
| 5942 Serum | N   |     | N   |     | N   |    |
|            | 1   | 4   | 7   | 9   | 12  | 25 |
| Urine      | 3.1 | 3.8 | N   | N   | N   | N  |
|            | 1   | 4   | 7   | 9   | 12  | 25 |
| Saliva     | 5.9 | 4.4 | N   | N   | N   | N  |
|            | 2   |     | 5   |     |     | 26 |
| 6506 Serum | N   |     | N   |     |     | N  |
|            | 3   |     | 8   | 11  | 15  | 26 |
| Urine      | 4.8 |     | 6.1 | N   | N   | N  |
|            | 3   | 5   | 8   | 11  | 15  | 26 |
| Saliva     | 5.3 | 6.2 | N   | N   | N   | N  |
|            | 1   |     | 5   |     |     | 24 |
| 6697 Serum | 6.5 |     | N   |     |     | N  |
|            | 2   | 3   | 5   | 9   | 12  | 24 |
| Urine      | N   | 5.7 | 5.4 | 4.8 | 3.8 | N  |
|            | 2   | 3   | 5   | 9   | 12  | 24 |
| Saliva     | 5.7 | 6.1 | 5.7 | N   | N   | N  |
|            | 2   |     | 4   |     |     | 26 |
| 6709 Serum | 7.5 |     | 4.9 |     |     | N  |
|            | 2   | 4   | 6   | 10  |     | 26 |
| Urine      | N   | 5.2 | 3.7 | 4.9 |     | N  |
|            | 2   | 4   | 6   | 10  |     | 26 |
| Saliva     | 5.1 | 6.3 | 6.5 | N   |     | N  |
|            | 2   |     | 3   |     |     | 27 |
| Serum      | N   |     | N   |     |     | N  |
| 7187       | 2   | 3   | 6   | 9   | 13  | 28 |
| Urine      | 3.6 | 4.7 | N   | N   | N   | N  |
|            | 2   | 3   | 6   | 9   | 13  | 27 |
| Saliva     | 6.3 | 5.3 | N   | N   | N   | N  |
|            | 2   |     | 3   |     |     | 25 |
| 7234 Serum | N   |     | N   |     |     | N  |
|            | 2   | 4   | 7   | 10  | 13  | 25 |
| Urine      | N   | N   | N   | N   | N   | N  |
|            | 2   | 4   | 7   | 10  | 13  | 25 |
| Saliva     | 5.7 | N   | N   |     | N   | N  |
|            | 1   |     | 5   |     |     | 24 |
| 7253 Serum | 6   |     | N   |     |     | N  |
|            | 1   | 3   | 5   | 9   | 12  | 24 |
| Urine      | N   | 5.2 | 5.2 | 4.5 | N   | N  |
|            | 1   | 3   |     | 9   | 12  | 24 |
| Saliva     | 5.2 | 5.1 |     | N   | N   | N  |
|            | 2   |     | 4   |     |     | 24 |
| 7273 Serum | N   |     | N   |     |     | N  |
|            | 2   | 3   | 6   | 9   | 12  | 24 |
| Urine      | 3.6 | 4.3 | N   | N   | N   | N  |
|            | 2   | 3   | 6   | 9   | 12  | 24 |
| Saliva     | 5   | 5   | 4.1 | N   | N   | N  |
|            | 2   |     | 5   |     |     | 28 |
| 7341 Serum | 5.4 |     | N   |     |     | N  |
|            | 3   | 5   | 8   | 11  | 14  | 28 |
| Urine      | 4.3 | 5.2 | 5.3 | 5.3 | 5.3 | N  |
|            | 3   | 5   | 8   | 11  | 14  | 28 |
| Saliva     | 5.7 | 4.5 | N   | N   | N   | N  |
|            | 1   |     | 6   |     |     | 27 |
| 7987 Serum | 5   |     | N   |     |     | N  |
|            |     | 6   | 9   | 11  | 15  | 27 |
| Urine      |     | N   | N   | N   | N   | N  |
|            |     | 6   | 9   | 11  | 15  | 27 |
| Saliva     |     | N   | N   | N   | N   | N  |
|            | 1   |     | 5   |     |     | 29 |
| 8079 Serum | 4.7 |     | N   |     |     | N  |
|            | 2   | 3   |     |     | 12  |    |
| Urine      | 1.7 | N   |     |     | 4   |    |
|            |     | 3   |     |     |     |    |
| Saliva     |     | 4.4 |     |     |     |    |
|            | 1   |     | 5   |     |     | 29 |
| 8208 Serum | N   |     | N   |     |     | N  |

|       |        |     |     |     |     |     |    |
|-------|--------|-----|-----|-----|-----|-----|----|
|       |        | 1   | 5   | 8   | 11  | 13  | 29 |
|       | Urine  | 4.6 | 3.3 | 5.4 | N   | N   | N  |
|       |        | 1   | 5   | 8   | 11  | 13  | 29 |
|       | Saliva | 5.6 | N   | N   | N   | N   | N  |
|       |        | 2   |     | 5   |     |     | 25 |
| 8280  | Serum  | 5.5 |     | N   |     |     | N  |
|       |        | 3   | 4   | 7   | 10  | 13  | 25 |
|       | Urine  | N   | 3.2 | 4.2 | 4.2 | 4.7 | N  |
|       |        | 3   | 4   | 7   | 10  | 13  | 25 |
|       | Saliva | 4.9 | N   | N   | N   | N   | N  |
|       |        | 1   |     |     |     |     | 23 |
| 8297  | Serum  | 5.8 |     |     |     |     | N  |
|       |        | 1   | 2   | 4   | 7   | 10  | 23 |
|       | Urine  | N   | 4.7 | 4.3 | N   | N   | N  |
|       |        | 1   | 2   | 4   | 7   | 10  | 23 |
|       | Saliva | 5.4 | 6   | 5.4 | 4.7 | N   | N  |
|       |        | 1   |     | 4   |     |     | 25 |
| 8594  | Serum  | N   |     | 2.9 |     |     | N  |
|       |        | 2   | 4   | 7   | 10  | 13  | 25 |
|       | Urine  | 4   | 4.5 | 4.4 | N   | N   | N  |
|       |        | 2   | 4   | 7   | 10  | 13  | 25 |
|       | Saliva | 6.3 | N   | N   | N   | N   | N  |
|       |        | 2   |     | 4   |     |     | 26 |
| 9226  | Serum  | N   |     | N   |     |     | N  |
|       |        | 2   | 5   | 8   | 11  |     | 26 |
|       | Urine  | 4.5 | N   | N   | N   |     | N  |
|       |        | 2   | 5   | 8   | 11  | 13  | 26 |
|       | Saliva | 6.9 | 5.2 | N   | N   | N   | N  |
|       |        | 2   |     | 3   |     |     | 26 |
| 9419  | Serum  | N   |     | N   |     |     | N  |
|       |        | 2   | 4   | 6   | 9   | 12  | 26 |
|       | Urine  | 3   | 5.2 | N   | N   | N   | N  |
|       |        | 2   | 4   | 6   | 9   | 12  | 26 |
|       | Saliva | 4.7 | 4.9 | N   | N   | N   | N  |
|       |        | 2   |     | 4   |     |     | 25 |
| 9421  | Serum  | 6.5 |     | N   |     |     | N  |
|       |        | 2   | 4   | 7   | 10  | 13  | 25 |
|       | Urine  | N   | N   | N   | N   | N   | N  |
|       |        | 2   | 4   | 7   | 10  | 13  | 25 |
|       | Saliva | 3.2 | 4.4 | N   | N   | N   | N  |
|       |        | 4   |     |     |     |     | 25 |
| 10605 | Serum  | P   |     |     |     |     | N  |
| P     |        |     | 4   | 7   | 10  | 13  | 25 |
|       | Urine  |     | 5.4 | 3.9 | N   | N   | N  |
|       |        |     | 4   | 7   | 10  | 13  | 25 |
|       | Saliva |     | N   | N   | N   | N   | N  |
|       |        | 2   |     |     |     |     | 23 |
| 10606 | Serum  | P   |     |     |     |     | N  |
|       |        |     | 2   | 5   | 8   | 11  | 23 |
|       | Urine  |     | 3.8 | N   | N   | N   | N  |
|       |        |     | 2   | 5   | 8   | 11  | 23 |
|       | Saliva |     | N   | N   | N   | N   | N  |
|       |        | 5   |     |     |     |     | 26 |
| 10731 | Serum  | P   |     |     |     |     | N  |
| P     |        |     | 5   |     | 11  | 14  | 26 |
|       | Urine  |     | 3.5 |     | N   | N   | N  |
|       |        |     | 5   |     | 11  | 14  | 26 |
|       | Saliva |     | N   |     | N   | N   | N  |
|       |        | 4   |     |     |     |     | 26 |
| 11324 | Serum  | P   |     |     |     |     | N  |
| P     |        |     | 4   | 7   | 10  | 13  |    |

|       |        |     |     |     |     |     |
|-------|--------|-----|-----|-----|-----|-----|
|       | Urine  | 4.8 | 4.7 | N   | N   |     |
|       | Saliva | 4   | 7   | 10  | 13  | 25  |
| 11479 | Serum  | 7   |     |     |     |     |
|       | Urine  | 5.4 | 5.3 | 3.9 | N   | N   |
|       | Saliva | N   | N   | N   | N   | N   |
| 2339  | Serum  | N   | N   |     |     | N   |
|       | Urine  | N   | N   | N   | N   | N   |
|       | Saliva | 4.2 | N   | N   | N   | N   |
| 6226  | Serum  | -1  | 2   |     |     | 20  |
|       | Urine  | 6.7 | N   |     |     | N   |
|       | Saliva | -1  | 2   | 5   | 7   | 20  |
|       | Urine  | N   | 5.4 | 4.7 | 4.2 | N   |
|       | Saliva | -1  | 2   | 5   | 7   | 20  |
|       | Urine  | N   | 5.5 | N   | N   | N   |
| 8743  | Serum  | 1   | 4   |     |     | 22  |
|       | Urine  | 4.6 | N   |     |     | N   |
|       | Saliva | 1   |     | 7   | 10  | 22  |
|       | Urine  | N   |     | 3.4 | 4.4 | N   |
| 8912  | Serum  | 1   |     |     |     |     |
|       | Urine  | 8.1 |     |     |     |     |
|       | Saliva |     | 3   | 7   |     | 22  |
|       | Urine  |     | 4.4 | 4.8 |     | 3.6 |
|       | Saliva |     |     | 7   |     | 22  |
|       | Urine  | 2   | 4   |     |     | 24  |
| 40009 | Serum  | N   | N   |     |     | N   |
|       | Urine  | 2   | 4   | 8   | 11  | 24  |
|       | Saliva | 5.5 | 6.1 | 4.9 | 4.1 | N   |
|       | Urine  | 2   | 4   | 8   | 11  | 24  |
|       | Saliva | N   | N   | N   | N   | N   |
| 40012 | Serum  | N   | N   |     |     | N   |
|       | Urine  | 4.2 | 4.5 | 3.7 | N   | N   |
|       | Saliva | N   | N   | N   | N   | N   |
| 40041 | Serum  | 4.7 | N   |     |     | N   |
|       | Urine  | N   | 5.6 | 4.6 | N   | N   |
|       | Saliva | N   | N   | N   | N   | N   |
| 40042 | Serum  | 2   | 5   |     |     |     |
|       | Urine  | N   | N   |     |     |     |
|       | Saliva | 2   |     | 8   |     | 23  |
|       | Urine  | 3.8 |     | N   |     | N   |
|       | Saliva | 2   | 5   | 8   | 12  | 23  |
|       | Urine  | 5.2 | N   | N   | N   | N   |
|       | Saliva | 4   | 7   |     |     |     |
| 40043 | Serum  | N   | N   |     |     |     |
|       | Urine  | 4   | 7   | 10  | 13  | 25  |
|       | Saliva | 5.2 | 4.7 | N   | N   | N   |
|       | Urine  | 4   | 7   | 10  | 13  | 25  |
|       | Saliva | N   | N   | N   | N   | N   |
| 40056 | Serum  | N   | N   |     |     | N   |
|       | Urine  | 4.5 | 6.4 |     |     |     |
|       | Saliva | N   | N   | N   |     | N   |
|       | Urine  | 6   | 9   |     |     | 27  |
| 40061 | Serum  | N   | N   |     |     | N   |
|       | Urine  | 6   | 9   | 11  | 15  | 27  |
|       | Saliva | 5.8 | 4.8 | N   | N   | N   |
|       | Urine  | 6   | 9   | 11  | 15  |     |
|       | Saliva | N   | N   | N   | N   |     |
