# Supplementary material for: Zika virus infection in Nicaraguan households
Source: PubMed Central journal article supplement (PMC6014677; doi:10.1371/journal.pntd.0006518), 2018-05-31
Supplement: pntd.0006518.s003.pdf [file pntd.0006518.s003.pdf]

**Supplementary Table 2:** Total reported and enrolled household members among the study households (n=33).

| Household    | Total reported household members | Total enrolled household members | Percent enrolled household members* |
|--------------|----------------------------------|----------------------------------|-------------------------------------|
| 1            | 10                               | 7                                | 70                                  |
| 2            | 4                                | 2                                | 50                                  |
| 3            | 12                               | 7                                | 58                                  |
| 4            | 3                                | 3                                | 100                                 |
| 5            | 5                                | 4                                | 80                                  |
| 6            | 6                                | 3                                | 50                                  |
| 7            | 4                                | 3                                | 75                                  |
| 8            | 4                                | 4                                | 100                                 |
| 9            | 7                                | 4                                | 57                                  |
| 10           | 4                                | 4                                | 100                                 |
| 11           | 14                               | 7                                | 50                                  |
| 12           | 4                                | 4                                | 100                                 |
| 13           | 5                                | 4                                | 80                                  |
| 14           | 5                                | 5                                | 100                                 |
| 15           | 4                                | 4**                              | 75                                  |
| 16           | 7                                | 4                                | 57                                  |
| 17           | 5                                | 3                                | 60                                  |
| 18           | 6                                | 5                                | 83                                  |
| 19           | 12                               | 7                                | 58                                  |
| 20           | 16                               | 5                                | 31                                  |
| 21           | 6                                | 3                                | 50                                  |
| 22           | 5                                | 3                                | 60                                  |
| 23           | 4                                | 2                                | 50                                  |
| 24           | 5                                | 3                                | 60                                  |
| 25           | 6                                | 5                                | 83                                  |
| 26           | 4                                | 3                                | 75                                  |
| 27           | 5                                | 2                                | 40                                  |
| 28           | 6                                | 6                                | 100                                 |
| 29           | 6                                | 4                                | 67                                  |
| 30           | 13                               | 8                                | 62                                  |
| 31           | 19                               | 5                                | 26                                  |
| 32           | 6                                | 5                                | 83                                  |
| 33           | 5                                | 4                                | 80                                  |
| <b>Total</b> | <b>227</b>                       | <b>142</b>                       | <b>63</b>                           |

\*Household members who were not enrolled were not present (at home) during enrollment visit.

\*\*One enrolled contact did not answer the individual questionnaire but fulfilled the other study requirements, such as symptom questionnaires and sample donation.
