# Supplementary material for: Zika virus infection in Nicaraguan households
Source: PubMed Central journal article supplement (PMC6014677; doi:10.1371/journal.pntd.0006518), 2018-05-31
Supplement: pntd.0006518.s004.pdf [file pntd.0006518.s004.pdf]

**Supplementary Table 3.** Duration of ZIKV RNA detection in bodily fluids of ZIKV rRT-PCR-positive study participants who presented Zika-associated symptoms.

|                     | <b>Serum/<br/>Plasma</b> | <b>Saliva</b> | <b>Urine</b> |
|---------------------|--------------------------|---------------|--------------|
| N <sup>1</sup>      | 25                       | 51            | 86           |
| Range <sup>2</sup>  | 6                        | 6             | 21           |
| Mean <sup>3</sup>   | 2.56                     | 3.10          | 5.94         |
| Standard Deviation  | 1.53                     | 1.50          | 3.80         |
| Median <sup>4</sup> | 2.00                     | 3.00          | 5.00         |
| Variance            | 2.34                     | 2.25          | 14.55        |

<sup>1</sup>Number of ZIKV rRT-PCR-positive samples from Zika cases that were included in the analysis of duration of ZIKV RNA detection

<sup>2</sup>Range of duration of ZIKV positivity in days post-symptom onset

<sup>3</sup>Mean duration of ZIKV positivity in days post-symptom onset

<sup>4</sup>Median duration of ZIKV positivity in days post-symptom onset
