# Supplementary material for: Zika virus infection in Nicaraguan households
Source: PubMed Central journal article supplement (PMC6014677; doi:10.1371/journal.pntd.0006518), 2018-05-31
Supplement: pntd.0006518.s005.pdf [file pntd.0006518.s005.pdf]

**Supplementary Table 4.** Symptoms recorded for study participants and ZIKV status based on rRT-PCR and/or IgM laboratory results.

|    | Subject ID | ZIKV Positive | Symptom 1  | Symptom 2           | Symptom 3                | Symptom 4                | Symptom 5        | Symptom 6 |
|----|------------|---------------|------------|---------------------|--------------------------|--------------------------|------------------|-----------|
| 1  | 5405       | No            | Cough      |                     |                          |                          |                  |           |
| 2  | 6154       | No            | Cough      | Nausea              | Vomit                    | Continous abdominal pain |                  |           |
| 3  | 6226       | Yes           | Rash       |                     |                          |                          |                  |           |
| 4  | 6454       | No            | Cough      | Rhinorrhea          |                          |                          |                  |           |
| 5  | 6941       | No            | Fever      | Cough               | Rhinorrhea               | Headache                 | Throatpain       |           |
| 6  | 7155       | Yes           | Arthralgia |                     |                          |                          |                  |           |
| 7  | 7508       | No            | Cough      |                     |                          |                          |                  |           |
| 8  | 7654       | No            | Cough      | Rhinorrhea          |                          |                          |                  |           |
| 9  | 8743       | Yes           | Fever      | Rash                |                          |                          |                  |           |
| 10 | 8912       | Yes           | Fever      | Rash                |                          |                          |                  |           |
| 11 | 40004      | Yes           | Nausea     | Headache            | Ophthalmoplegia          |                          |                  |           |
| 12 | 40009      | Yes           | Fever      | Arthralgia          | Rash                     | Rhinorrhea               |                  |           |
| 13 | 40011      | No            | Cough      | Rhinorrhea          | Throatpain               |                          |                  |           |
| 14 | 40014      | No            | Fever      | Headache            | Continous abdominal pain | Diarrhea                 |                  |           |
| 15 | 40015      | No            | Headache   | Vomit               | Diarrhea                 | Arthralgia               | Retroocular pain |           |
| 16 | 40024      | Yes           | Pruritus   | Arthralgia          |                          |                          |                  |           |
| 17 | 40027      | No            | Cough      | Throatpain          | Fever                    | Headache                 |                  |           |
| 18 | 40030      | No            | Cough      | Rhinorrhea          | Throatpain               |                          |                  |           |
| 19 | 40038      | Yes           | Arthralgia |                     |                          |                          |                  |           |
| 20 | 40039      | No            | Headache   |                     |                          |                          |                  |           |
| 21 | 40042      | Yes           | Fever      | Headache            | Rash                     | Difficulty breathing     | Arthralgia       | Cough     |
| 22 | 40043      | Yes           | Headache   | Rash                | Fever                    | Cough                    |                  |           |
| 23 | 40052      | Yes           | Rash       | Shivers             | Arthralgia               |                          |                  |           |
| 24 | 40060      | No            | Pruritus   |                     |                          |                          |                  |           |
| 25 | 40061      | Yes           | Rash       |                     |                          |                          |                  |           |
| 26 | 40064      | No            | Arthralgia | Myalgia             | Cefalea                  | Poor general health      |                  |           |
| 27 | 40066      | Yes           | Fever      |                     |                          |                          |                  |           |
| 28 | 40067      | No            | Fever      | Poor general health | Arthralgia               |                          |                  |           |
| 29 | 40071      | No            | Rash       | Pruritus            |                          |                          |                  |           |
| 30 | 40072      | No            | Arthralgia |                     |                          |                          |                  |           |
| 31 | 40074      | No            | Fever      |                     |                          |                          |                  |           |
| 32 | 40075      | No            | Fever      | Headache            | Poor general health      |                          |                  |           |
| 33 | 40077      | Yes           | Headache   |                     |                          |                          |                  |           |
| 34 | 40080      | No            | Headache   |                     |                          |                          |                  |           |
