# Supplementary material for: Zika virus infection in Nicaraguan households
Source: PubMed Central journal article supplement (PMC6014677; doi:10.1371/journal.pntd.0006518), 2018-05-31
Supplement: pntd.0006518.s006.pdf [file pntd.0006518.s006.pdf]

STROBE Statement—checklist of items applied to the Zika virus infection in Nicaraguan household study (final column)

|                              | <b>Item No</b> | <b>Recommendation</b>                                                                                                                                                                                                                                                                                                                                                                                                                                                  | <b>Application</b>                                                      |
|------------------------------|----------------|------------------------------------------------------------------------------------------------------------------------------------------------------------------------------------------------------------------------------------------------------------------------------------------------------------------------------------------------------------------------------------------------------------------------------------------------------------------------|-------------------------------------------------------------------------|
| <b>Title and abstract</b>    | 1              | (a) Indicate the study’s design with a commonly used term in the title or the abstract                                                                                                                                                                                                                                                                                                                                                                                 | Title includes the term household (for household index cluster study)   |
|                              |                | (b) Provide in the abstract an informative and balanced summary of what was done and what was found                                                                                                                                                                                                                                                                                                                                                                    | Provided in abstract                                                    |
| <b>Introduction</b>          |                |                                                                                                                                                                                                                                                                                                                                                                                                                                                                        |                                                                         |
| Background/rationale         | 2              | Explain the scientific background and rationale for the investigation being reported                                                                                                                                                                                                                                                                                                                                                                                   | Paragraphs 1 and 2 of introduction.                                     |
| Objectives                   | 3              | State specific objectives, including any prespecified hypotheses                                                                                                                                                                                                                                                                                                                                                                                                       | Paragraphs 2 and 3 of introduction.                                     |
| <b>Methods</b>               |                |                                                                                                                                                                                                                                                                                                                                                                                                                                                                        |                                                                         |
| Study design                 | 4              | Present key elements of study design early in the paper                                                                                                                                                                                                                                                                                                                                                                                                                | See “Population and study design” in Methods                            |
| Setting                      | 5              | Describe the setting, locations, and relevant dates, including periods of recruitment, exposure, follow-up, and data collection                                                                                                                                                                                                                                                                                                                                        | See “Population and study design” in Methods                            |
| Participants                 | 6              | (a) <i>Cohort study</i> —Give the eligibility criteria, and the sources and methods of selection of participants. Describe methods of follow-up<br><i>Case-control study</i> —Give the eligibility criteria, and the sources and methods of case ascertainment and control selection. Give the rationale for the choice of cases and controls<br><i>Cross-sectional study</i> —Give the eligibility criteria, and the sources and methods of selection of participants | N/A                                                                     |
|                              |                | (b) <i>Cohort study</i> —For matched studies, give matching criteria and number of exposed and unexposed<br><i>Case-control study</i> —For matched studies, give matching criteria and the number of controls per case                                                                                                                                                                                                                                                 | See “Population and study design” in Methods                            |
| Variables                    | 7              | Clearly define all outcomes, exposures, predictors, potential confounders, and effect modifiers. Give diagnostic criteria, if applicable                                                                                                                                                                                                                                                                                                                               | See “Definition of ZIKV infection and symptomatic Zika case” in Methods |
| Data sources/<br>measurement | 8*             | For each variable of interest, give sources of data and details of methods of assessment (measurement). Describe comparability of assessment methods if there is more than one group                                                                                                                                                                                                                                                                                   | See “Laboratory assays” in Methods                                      |
| Bias                         | 9              | Describe any efforts to address potential sources of                                                                                                                                                                                                                                                                                                                                                                                                                   | See 5 <sup>th</sup> paragraph of                                        |

|                        |    |                                                                                                                                                                                                                                                                                                           |                                              |
|------------------------|----|-----------------------------------------------------------------------------------------------------------------------------------------------------------------------------------------------------------------------------------------------------------------------------------------------------------|----------------------------------------------|
|                        |    | bias                                                                                                                                                                                                                                                                                                      | discussion.                                  |
| Study size             | 10 | Explain how the study size was arrived at                                                                                                                                                                                                                                                                 | See “Population and study design” in Methods |
| Quantitative variables | 11 | Explain how quantitative variables were handled in the analyses. If applicable, describe which groupings were chosen and why                                                                                                                                                                              | See “Statistical analysis“ in Methods        |
| Statistical methods    | 12 | (a) Describe all statistical methods, including those used to control for confounding                                                                                                                                                                                                                     | See “Statistical analysis“ in Methods        |
|                        |    | (b) Describe any methods used to examine subgroups and interactions                                                                                                                                                                                                                                       | N/A                                          |
|                        |    | (c) Explain how missing data were addressed                                                                                                                                                                                                                                                               | See “Population and study design” in Methods |
|                        |    | (d) <i>Cohort study</i> —If applicable, explain how loss to follow-up was addressed<br><i>Case-control study</i> —If applicable, explain how matching of cases and controls was addressed<br><i>Cross-sectional study</i> —If applicable, describe analytical methods taking account of sampling strategy | See “Statistical analysis“ in Methods        |
|                        |    | (e) Describe any sensitivity analyses                                                                                                                                                                                                                                                                     | N/A                                          |

Continued on next page

| <b>Results</b>           |     | <b>Application</b>                                                                                                                                                                                           |                                           |
|--------------------------|-----|--------------------------------------------------------------------------------------------------------------------------------------------------------------------------------------------------------------|-------------------------------------------|
| Participants             | 13* | (a) Report numbers of individuals at each stage of study—eg numbers potentially eligible, examined for eligibility, confirmed eligible, included in the study, completing follow-up, and analysed            | See paragraph 1 of results and Fig. 1     |
|                          |     | (b) Give reasons for non-participation at each stage                                                                                                                                                         | See paragraph 1 of results and Fig. 1     |
|                          |     | (c) Consider use of a flow diagram                                                                                                                                                                           | See Fig. 1                                |
| Descriptive data         | 14* | (a) Give characteristics of study participants (eg demographic, clinical, social) and information on exposures and potential confounders                                                                     | See paragraph 1 of results and Fig. 1     |
|                          |     | (b) Indicate number of participants with missing data for each variable of interest                                                                                                                          | See paragraph 1 of results, Fig. 1 and SI |
|                          |     | (c) <i>Cohort study</i> —Summarise follow-up time (eg, average and total amount)                                                                                                                             | N/A                                       |
| Outcome data             | 15* | <i>Cohort study</i> —Report numbers of outcome events or summary measures over time                                                                                                                          | N/A                                       |
|                          |     | <i>Case-control study</i> —Report numbers in each exposure category, or summary measures of exposure                                                                                                         | See all paragraphs of results section     |
|                          |     | <i>Cross-sectional study</i> —Report numbers of outcome events or summary measures                                                                                                                           | N/A                                       |
| Main results             | 16  | (a) Give unadjusted estimates and, if applicable, confounder-adjusted estimates and their precision (eg, 95% confidence interval). Make clear which confounders were adjusted for and why they were included | Last paragraph of results section         |
|                          |     | (b) Report category boundaries when continuous variables were categorized                                                                                                                                    | N/A                                       |
|                          |     | (c) If relevant, consider translating estimates of relative risk into absolute risk for a meaningful time period                                                                                             | N/A                                       |
| Other analyses           | 17  | Report other analyses done—eg analyses of subgroups and interactions, and sensitivity analyses                                                                                                               | N/A                                       |
| <b>Discussion</b>        |     |                                                                                                                                                                                                              |                                           |
| Key results              | 18  | Summarise key results with reference to study objectives                                                                                                                                                     | See paragraph 1 of discussion section     |
| Limitations              | 19  | Discuss limitations of the study, taking into account sources of potential bias or imprecision. Discuss both direction and magnitude of any potential bias                                                   | See paragraph 5 of discussion section     |
| Interpretation           | 20  | Give a cautious overall interpretation of results considering objectives, limitations, multiplicity of analyses, results from similar studies, and other relevant evidence                                   | See paragraph 1 of discussion section     |
| Generalisability         | 21  | Discuss the generalisability (external validity) of the study results                                                                                                                                        | See last paragraph of discussion section  |
| <b>Other information</b> |     |                                                                                                                                                                                                              |                                           |
| Funding                  | 22  | Give the source of funding and the role of the funders for the present study and, if applicable, for the original study on which the present article is based                                                | See acknowledgement section               |

\*Give information separately for cases and controls in case-control studies and, if applicable, for exposed and unexposed groups in cohort and cross-sectional studies.

**Note:** An Explanation and Elaboration article discusses each checklist item and gives methodological background and published examples of transparent reporting. The STROBE checklist is best used in conjunction with this article (freely available on the Web sites of PLoS Medicine at <http://www.plosmedicine.org/>, Annals of Internal Medicine at <http://www.annals.org/>, and Epidemiology at <http://www.epidem.com/>). Information on the STROBE Initiative is available at [www.strobe-statement.org](http://www.strobe-statement.org).
